# Supplementary material
Source: PubMed Central journal article supplement (PMC4902771)
Supplement: NIHMS782235-supplement-supplement_1.pdf [file NIHMS782235-supplement-supplement_1.pdf]

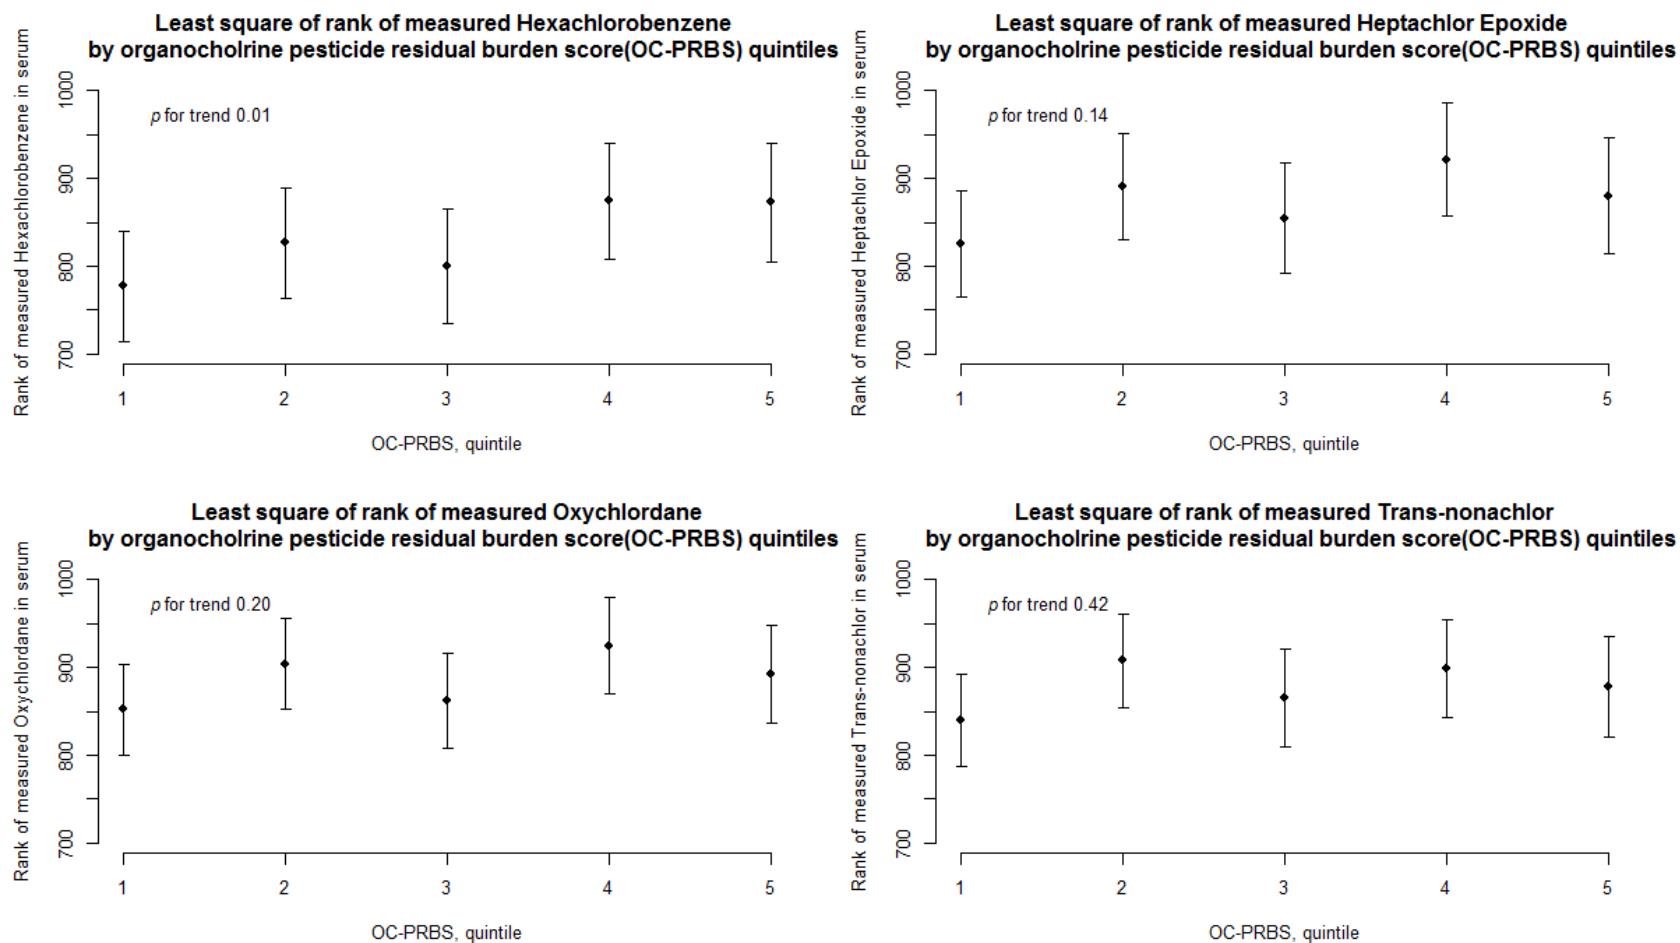

**Supplemental Fig. 1.** The ability of OC-PRBS to differentiate high versus low level of individual organochlorine pesticides intake. The general linear models adjusted for age (< 20 years, 20-40 years, 40-60 years and over 60 years), gender (male/female), race (white/non-white), smoking status (never smoker, past smoker, current 1-10 cigarettes/day, current 11-20 cigarettes/day and current 21 more cigarettes/day), body mass index (<25kg/m<sup>2</sup>, 25-29.9kg/m<sup>2</sup>, ≥30kg/m<sup>2</sup>), physical activity (vigorous or moderate activity over past 30 days, yes/no) and pest control in past month (yes/no).

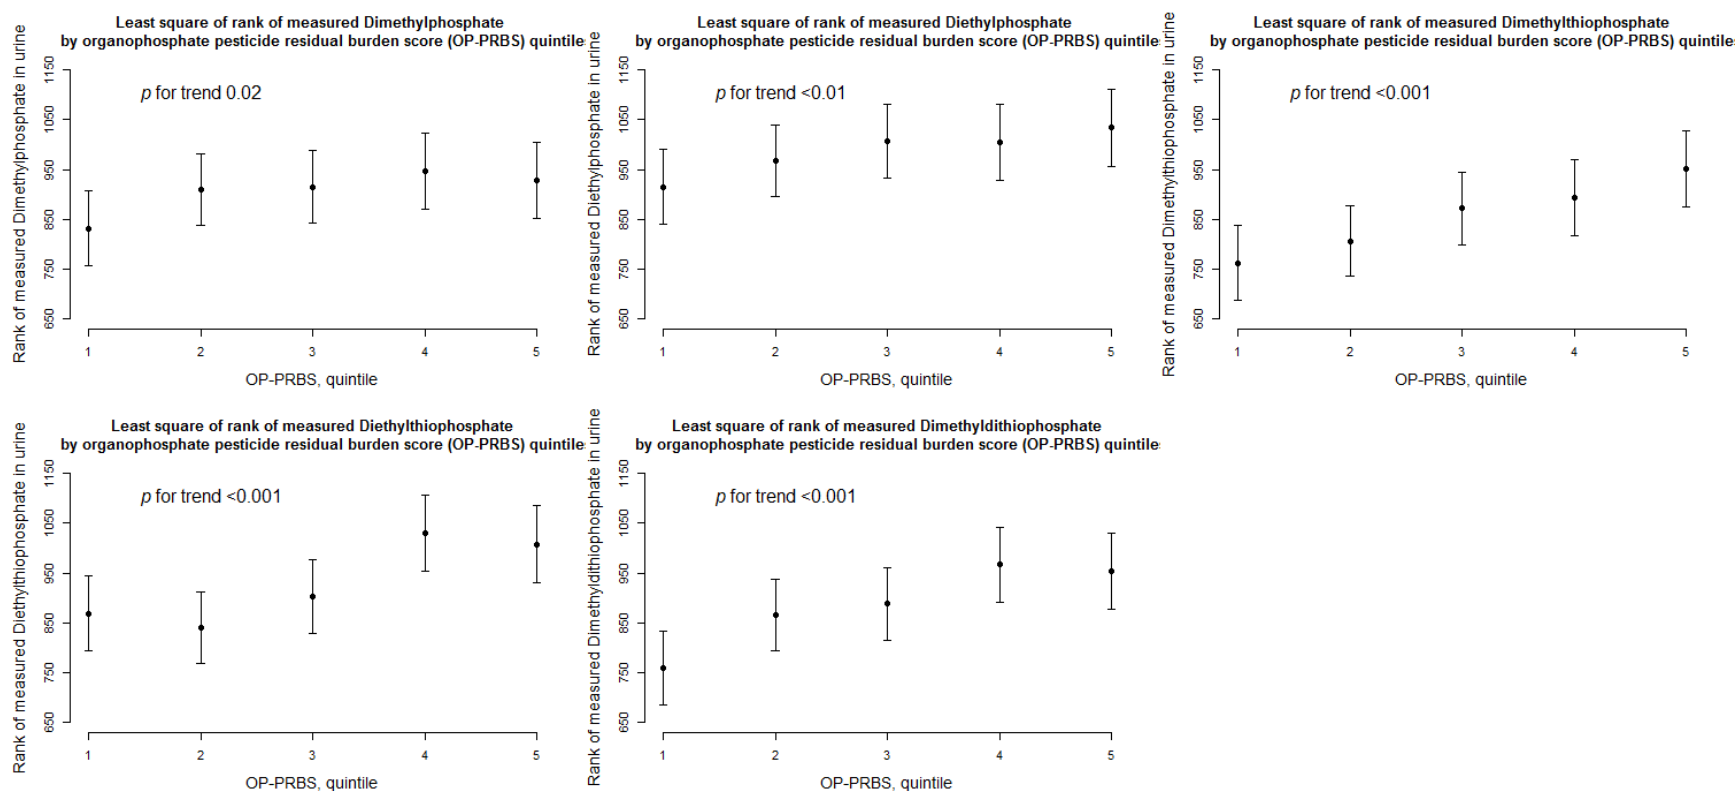

**Supplemental Fig. 2.** The ability of OP-PRBS to differentiate high versus low level of individual organophosphate pesticides intake. The general linear models adjusted for age ( $< 20$  years, 20-40 years, 40-60 years and over 60 years), gender (male/female), race (white/non-white), smoking status (never smoker, past smoker, current 1-10 cigarettes/day, current 11-20 cigarettes/day and current 21 more cigarettes/day), body mass index ( $<25\text{kg/m}^2$ ,  $25\text{-}29.9\text{kg/m}^2$ ,  $\geq 30\text{kg/m}^2$ ), physical activity (vigorous or moderate activity over past 30 days, yes/no) and pest control in past month (yes/no).

**Supplemental table 1**

Distribution of pesticide rank score among 29 included fruits and vegetables.

|    | Commodity          | Pesticide Rank Score |
|----|--------------------|----------------------|
| 1  | onions             | 3                    |
| 2  | orange juice       | 3                    |
| 3  | sweet corn, frozen | 3                    |
| 4  | bananas            | 4                    |
| 5  | grapefruit         | 4                    |
| 6  | peaches            | 4                    |
| 7  | tomatoes           | 4                    |
| 8  | beans              | 5                    |
| 9  | cauliflower        | 5                    |
| 10 | sweet potatoes     | 5                    |
| 11 | watermelon         | 5                    |
| 12 | broccoli           | 6                    |
| 13 | cantaloupe         | 6                    |
| 14 | oranges            | 6                    |
| 15 | pears              | 6                    |
| 16 | raisins            | 6                    |
| 17 | summer squash      | 6                    |
| 18 | applesauce         | 7                    |
| 19 | apples             | 7                    |
| 20 | carrots            | 7                    |
| 21 | cucumbers          | 7                    |
| 22 | lettuce            | 7                    |
| 23 | plums              | 7                    |
| 24 | grapes             | 8                    |
| 25 | collard            | 8                    |
| 26 | kale               | 8                    |
| 27 | spinach            | 8                    |

|    |                    |   |
|----|--------------------|---|
| 28 | sweet bell peppers | 8 |
| 29 | strawberries       | 9 |

---

**Supplemental table 2**Pesticides included in calculating OC-PRBS and OP-PRBS. <sup>a</sup>

---

| Pesticide used in deriving OC-PRBS | Pesticide used in deriving OP-PRBS |
|------------------------------------|------------------------------------|
| Aldrin                             | Diazinon                           |
| Captan                             | Azinphos methyl                    |
| Dieldrin                           | Malathion                          |
| Diuron                             | Parathion methyl                   |
| Anilazine                          | Parathion methyl                   |
| Endrin                             | Mevinphos Total                    |
| Heptachlor                         | TEPP                               |
| Monuron                            | Ethion                             |
| Lindane(BHC gamma)                 | Disulfoton                         |
| Methoxychlor Total                 | Coumaphos                          |
| Neburon                            | Phorate                            |
| Tetradifon                         | Chlorpyrifos                       |
| Folpet                             | Fonofos                            |
| Linuron                            | Phosmet                            |
| DCPA                               | Phosalone                          |
| Heptachlor epoxide                 | Methamidophos                      |
| Dicloran                           | Dimethoate                         |
| Tecnazene                          | Ethoprop                           |
| Trifluralin                        | Tetrachlorvinphos                  |
| Terbacil                           | Fenthion                           |
| Chlorothalonil                     | Omethoate                          |
| Chlordane trans                    | Phorate sulfone                    |
| Chlordane cis                      | Phorate sulfoxide                  |
| Captafol                           | Methidathion                       |
| Benfluralin                        | Carbophenothion                    |
| Dicofol o,p'                       | Phosphamidon                       |
| Dicofol p,p'                       | Acephate                           |

|                                  |                                |
|----------------------------------|--------------------------------|
| Fenarimol                        | Terbufos                       |
| Methoxychlor p,p'                | Malathion oxygen analog        |
| Methoxychlor olefin              | Dicrotophos                    |
| Metolachlor                      | Disulfoton sulfone             |
| Pentachlorophenol                | DEF (Tribufos)                 |
| Hexachlorobenzene (HCB)          | Oxydemeton methyl              |
| Propanil                         | Chlorpyrifos methyl            |
| Oxychlordane                     | Fenamiphos                     |
| Pentachloroaniline (PCA)         | Oxydemeton methyl sulfone      |
| Pentachlorobenzene (PCB)         | Isofenphos                     |
| Pentachlorophenyl methyl sulfide | Sulfotep                       |
| Vinclozolin                      | Dichlorvos (DDVP)              |
| Pronamide                        | Monocrotophos                  |
| Procymidone                      | Parathion oxygen analog        |
| Norflurazon                      | Fenitrothion                   |
| Tetrahydrophthalimide (THPI)     | Diazinon oxygen analog         |
| Oxadiazon                        | Ethion di oxon                 |
| Iprodione                        | Pirimiphos methyl              |
| Diflubenzuron                    | Mevinphos                      |
| Propachlor                       | Sulprofos                      |
| Clofentezine                     | Coumaphos oxygen analog        |
| Fluometuron                      | Chlorfenvinphos beta           |
| Oxyfluorfen                      | Propetamphos                   |
| Clomazone                        | Fenamiphos sulfone             |
| Norflurazon desmethyl            | Fenamiphos sulfoxide           |
| Ethalfuralin                     | Chlorpyrifos oxygen analog     |
| Etridiazole                      | Parathion methyl oxygen analog |
| Nitrapyrin                       | Phorate oxygen analog          |
| Acifluorfen                      | Phosalone oxygen analog        |
| Fluridone                        | Cadusafos                      |

|                                       |                               |
|---------------------------------------|-------------------------------|
| Butachlor                             | Terbufos sulfone              |
| Acetochlor                            | Phorate oxygen analog sulfone |
| Endosulfan I                          | Chlorethoxyfos                |
| Endosulfan II                         | Tebupirimfos                  |
| Endosulfan sulfate                    | Terbufos-O analog             |
| BHC alpha                             | Chlorfenvinphos total         |
| BHC beta                              | Ethion mono oxon              |
| DDT p,p'                              | Chlorpyrifos methyl O-analog  |
| DDT o,p'                              | Sulprofos oxygen analog       |
| DDD p,p'                              | Tebupirimfos oxygen analog    |
| DDD o,p'                              |                               |
| DDE p,p'                              |                               |
| DDE o,p'                              |                               |
| Triforine                             |                               |
| Chloramben                            |                               |
| Imidacloprid                          |                               |
| Lactofen                              |                               |
| Fipronil                              |                               |
| Flumetsulam                           |                               |
| 3,5-Dichloroaniline                   |                               |
| Acetochlor ethanesulfonic acid (ESA)  |                               |
| Acetochlor oxanilic acid (OA)         |                               |
| Alachlor ethanesulfonic acid (ESA)    |                               |
| Alachlor oxanilic acid (OA)           |                               |
| DCPA monoacid                         |                               |
| Metolachlor ethanesulfonic acid (ESA) |                               |
| Metolachlor oxanilic acid (OA)        |                               |
| Niclosamide                           |                               |
| Chlorfenapyr                          |                               |

Isoxaflutole  
Carfentrazone ethyl  
Fludioxonil  
Flufenacet  
Forchlorfenuron  
Thiamethoxam  
Zoxamide  
Pyridaben  
Flutolanil  
Tolclofos methyl

---

<sup>a</sup> Not every pesticides included were detected in commodity samples.



**Supplemental table 3**

Comparison of three studies that aimed to derive pesticide exposure instruments that could predict health outcome.

| Leading author            | Types of pesticides evaluated                                            | Features                                                                                                                                                                                                                                                                                      | Limitations                                                                                                                                                              |
|---------------------------|--------------------------------------------------------------------------|-----------------------------------------------------------------------------------------------------------------------------------------------------------------------------------------------------------------------------------------------------------------------------------------------|--------------------------------------------------------------------------------------------------------------------------------------------------------------------------|
| Chiu, et al               | Overall pesticide exposures                                              | Fruits and vegetables were categorized into highly-contaminated and less-contaminated classes. The score was associated with low-semen quality for participants consuming highly-contaminated fruits and vegetables, and no association was found for less-contaminated fruits and vegetables | The heterogeneous effects of pesticides residues on fruits and vegetables were not considered and the variations of detectable pesticides residues may be underestimated |
| Curl, et al               | Organophosphate pesticide                                                | Food consumption-chemical residual (FCCR) approach was used to calculating the OP pesticide exposure from diet and the score was associated with urinary DAP concentrations in a dose-response fashion                                                                                        | Lack of assessment of other classes of pesticides exposure                                                                                                               |
| Hu, et al (current study) | Overall pesticide exposure, organochlorine and organophosphate pesticide | Rank-based score method was used to derive PRBS, OC-PRBS and OP-PRBS. All three scores were significantly correlated with serum and urinary pesticide metabolite levels                                                                                                                       | The scores were rank-based and thus could not reflect absolute exposure levels                                                                                           |
